# Supplementary material for: Diacron reactive oxygen metabolites and biological antioxidant potential tests for patients with age-related macular degeneration
Source: Springer Nature journal article supplement (doi:10.1186/s12886-020-01334-y), 2020-02-18
Supplement: MOESM1 [file 17720134]

**Additional file 1.**

Raw data of patient/subject characteristics in this study. d-ROM = diacron reactive oxygen metabolite. BAP = biological antioxidant potential. CNV = choroidal neovascularization. logMAR = logarithm of the minimum angle of resolution. BCVA = best corrected visual acuity.

|           | sex    | d-ROMs<br>(U.CARR) | BAP ( $\mu\text{mol/L}$ ) | CNV size<br>( $\text{mm}^2$ ) | smoking | logMAR<br>BCVA |
|-----------|--------|--------------------|---------------------------|-------------------------------|---------|----------------|
| patient1  | female | 300                | 1772                      | 12.2788                       | no      | 1              |
| patient2  | female | 326                | 2390                      | 0.9704                        | no      | 0.301029996    |
| patient3  | female | 402                | 2183                      | 2.3644                        | no      | 0.397940009    |
| patient4  | female | 420                | 2313                      | 4.1048                        | no      | 0              |
| patient5  | female | 291                | 2179                      | 5.2216                        | no      | 0.096910013    |
| patient6  | female | 527                | 2417                      | 3.2032                        | no      | 0.886056648    |
| patient7  | female | 306                | 2682                      | 2.8024                        | no      | 0.698970004    |
| patient8  | female | 269                | 2445                      | 0.478                         | no      | 0.795880017    |
| patient9  | female | 251                | 2031                      | 0.576                         | no      | 1.045757491    |
| patient10 | female | 285                | 2012                      | 1.8316                        | no      | 0.096910013    |
| patient11 | female | 351                | 2749                      | 2.9908                        | yes     | 1.22184875     |
| patient12 | female | 215                | 1978                      | 0.9188                        | no      | 0              |
|           |        |                    |                           |                               |         |                |
| patient13 | male   | 376                | 2351                      | 7.0004                        | yes     | 0.301029996    |
| patient14 | male   | 313                | 2006                      | 2.328                         | no      | 1.522878745    |
| patient15 | male   | 402                | 2224                      | 2.6692                        | yes     | 0.301029996    |
| patient16 | male   | 339                | 2712                      | 1.7188                        | no      | 0.22184875     |
| patient17 | male   | 286                | 2187                      | 2.828                         | no      | 0.22184875     |
| patient18 | male   | 298                | 3321                      | 1.59                          | yes     | 0              |
| patient19 | male   | 262                | 2551                      | 1.384                         | no      | 0.397940009    |
| patient20 | male   | 306                | 3705                      | 1.9792                        | no      | 1.397940009    |
| patient21 | male   | 378                | 2963                      | 5.2112                        | no      | 0.22184875     |
| patient22 | male   | 306                | 2227                      | 4.3816                        | yes     | 0.301029996    |
| patient23 | male   | 257                | 2045                      | 2.5988                        | yes     | 0.096910013    |
| patient24 | male   | 287                | 1764                      | 2.2824                        | no      | 0              |
| patient25 | male   | 378                | 2223                      | 8.0836                        | no      | 1              |
| patient26 | male   | 310                | 2223                      | 4.8284                        | no      | 0.301029996    |
| patient27 | male   | 257                | 2060                      | 2.1316                        | no      | 1              |
| patient28 | male   | 378                | 2199                      | 1.9244                        | no      | 0.397940009    |
| patient29 | male   | 260                | 1817                      | 2.6004                        | no      | 0.602059991    |

|           |        |     |      |        |     |             |
|-----------|--------|-----|------|--------|-----|-------------|
| patient30 | male   | 199 | 1808 | 1.544  | no  | 0.397940009 |
| patient31 | male   | 257 | 1922 | 0.4256 | no  | 0.22184875  |
| patient32 | male   | 362 | 2062 | 5.13   | no  | 0.795880017 |
| patient33 | male   | 333 | 1724 | 2.1268 | no  | 0.22184875  |
| patient34 | male   | 321 | 2208 | 2.3912 | no  | 0.22184875  |
|           |        |     |      |        |     |             |
| control1  | female | 361 | 2300 |        | no  | 0.301029996 |
| control2  | female | 331 | 2129 |        | no  | -0.11394335 |
| control3  | female | 323 | 2564 |        | no  | 0           |
| control4  | female | 381 | 2397 |        | no  | 0.096910013 |
| control5  | female | 273 | 2528 |        | yes | 0.698970004 |
| control6  | female | 391 | 2410 |        | no  | 0.522878745 |
| control7  | female | 302 | 2452 |        | no  | 0.301029996 |
| control8  | female | 341 | 2099 |        | no  | 0           |
| control9  | female | 377 | 2234 |        | no  | 0.301029996 |
| control10 | female | 345 | 2237 |        | no  | 0           |
|           |        |     |      |        |     |             |
| control11 | male   | 225 | 2544 |        | no  | 0.301029996 |
| control12 | male   | 231 | 1998 |        | yes | 0           |
| control13 | male   | 268 | 2142 |        | no  | 0           |
| control14 | male   | 250 | 2125 |        | no  | 0.602059991 |
| control15 | male   | 237 | 2265 |        | no  | 1.22184875  |
| control16 | male   | 258 | 1602 |        | no  | -0.11394335 |
| control17 | male   | 286 | 2162 |        | no  | 0           |
| control18 | male   | 328 | 2343 |        | no  | -0.11394335 |
| control19 | male   | 303 | 2021 |        | no  | 0.096910013 |
| control20 | male   | 365 | 2155 |        | yes | 0.301029996 |
